# Supplementary material for: Identification of a unique gene expression signature in mercury and 2,3,7,8-tetrachlorodibenzo-p-dioxin co-exposed cells
Source: Royal Society of Chemistry journal article supplement (doi:10.1039/c6tx00432f), 2017-01-01
Supplement: c6tx00432f1.pdf [file c6tx00432f1.pdf]

## Supplementary Materials

### Supplemental Table S1: Sequence list of primers for validating RNA-seq results.

| S.NO | Primer Name | Sequence                   |
|------|-------------|----------------------------|
| 1    | ATF4-F      | CCCCCAGACGGTGAAC           |
| 2    | ATF4-R      | CAACCTGGTCGGGTTTTGTAA      |
| 3    | DDIT4-F     | CGGGTGGCTGTGCATTG          |
| 4    | DDIT4-R     | GTTGGCCCCTAAGCCTTTG        |
| 5    | IL6 -F      | AGGGCTCTTCGGCAAATGTA       |
| 6    | IL6 -R      | GAAGGAATGCCATTAACAACAA     |
| 7    | MT2A-F      | CCCGCTCCAGATGTAAAGA        |
| 8    | MT2A-F      | GGTCACGGTCAGGGTTGTACATA    |
| 9    | PCK2-F      | CGCCATGCGCTCTGAGT          |
| 10   | PCK2-R      | GGGTCGTGCATGATGATCTTC      |
| 11   | PHGDH-F     | CACAGCGGCCGATTCC           |
| 12   | PHGDH-R     | CACTTTCCGCAGATTTGCAA       |
| 13   | TRIB3-F     | CTGACAACACTTTTCCATGACCATAG |
| 14   | TRIB3-R     | GGAGGCCGACACTGGTACA        |
